# Supplementary material
Source: publisher figshare collection journal article supplement (https://gsajournals.figshare.com/ndownloader/files/21385122)
Supplement: Supplementary file 1 [file 21385122]

## Sheet: KlSir2 2016
Klacits ORF	Klactis gene	Scer ortholog	Scer gene	MA2Cscore	log2FC sir2/wt 2016	2012 list	log2FC sir2/wt 2012	up in sum1	log2FC sum1/wt 2016	up in sir4	ScHst1 regulated	category	subcategory	description
KLLA0C13255g		YNL102W	POL1	5.9198	1.12115	N	0.267986	Y	1.78952	N	N	DNA synthesis	DNA polymerase	Catalytic subunit of DNA polymerase alpha-primase complex; required for initiation of DNA replication
KLLA0E22419g		YJR043C	POL32	3.1674	1.0013	N	-0.517661	Y	1.14185	N	N	DNA synthesis	DNA polymerase	Subunit of DNA polymerase delta; involved in DNA replication and repair; interacts with PCNA
KLLA0F04774g		YNL072W	RNH201	4.4315	1.15101	N	0.587475	Y	1.57499	N	N	DNA synthesis	DNA repair during synthesis	Ribonuclease H2 catalytic subunit; removes misincorporated ribonucleotides and RNA primers in Okazaki fragments
KLLA0F01188g		YER070W/YIL066C	RNR1/RNR3	1.9275	1.15349	N	0.648666	Y	1.94554	N	N	DNA synthesis	dNTP synthesis	Ribonucleotide-diphosphate reductase; the RNR complex catalyzes rate-limiting step in dNTP synthesis; this K.lactis gene is highly similar to Kl syntenic ortholog of ScRNR1/3
KLLA0E25081g				4.1713	2.77651	Y	3.5336	N	0.436134	N	N	Membranes & cell wall	cell wall protein	beta-glucosidase, hydrolyzes glycosidic bonds in polysaccharides such as beta-glucan
KLLA0F24486g				6.7283	5.80826	Y	6.6217	Y	6.79696	N	N	Membranes & cell wall	cell wall protein	Putative cell wall mannoprotein
KLLA0B14927g				10.2668	4.22275	Y	5.56497	N	NA	N	N	Membranes & cell wall	membrane-associated protein	serine/threonine-rich protein; probable cell-surface glycosylated protein
KLLA0C14949g				1.4461	1.45704	Y	3.12101	N	-0.113554	N	N	Membranes & cell wall	membrane-associated protein	Related to BSC6 - Membrane protein of unknown function associated with clathrin-coated vesicles
KLLA0D19921g		YOL154W	ZPS1	4.3713	2.34783	Y	2.95671	Y	2.32332	N	N	Membranes & cell wall	membrane-associated protein	Putative GPI-anchored protein induced by low zinc and alkaline pH; one of two highly similar K.lactis subtelomeric genes
KLLA0E09593g				2.6406	3.51887	Y	3.80406	Y	3.7958	N	N	Membranes & cell wall	protein trafficking	putative alpha-1,2-mannosidase, role in maturation of N-linked oligosaccharides and ER-associated degradation
KLLA0D02420g		YJL079C/YKR013W	PRY1/PRY2	2.684	5.02232	Y	4.75386	Y	6.00255	N	N	Membranes & cell wall	sterol transport	secreted glycoprotein; involved in export of acetylated sterols, to which it binds; may be involved in detoxification of hydrophobic compounds
KLLA0C00440g		YCL064C	CHA1	6.8376	1.60663	Y	1.38766	Y	1.20219	N	N	Metabolism	amino acid catabolism	Serine/threonine deaminase; generates pyruvate from serine; required to use serine or threonine as nitrogen source
KLLA0A04906g				3.0244	2.10493	Y	3.6012	Y	2.23028	N	N	Metabolism	amino acid catabolism - Ehrlich pathway	Related to ARO8 - Aromatic aminotransferase I, involved in phe/trp degradation with SFA1 and ARO10
KLLA0D19941g		YKR105C/YCL069W	VBA5/VBA3	2.911	1.09588	N	0.798223	Y	1.62724	N	N	Metabolism	amino acid transport	amino acid permease; one of two similar K. lactis genes
KLLA0F01012g				3.918	2.74658	Y	3.08002	Y	4.21253	N	N	Metabolism	amino acid transport	Related to AGP1/GNP1 - paralogous amino acid permeases
KLLA0B12980g				1.4313	1.24863	Y	1.51078	N	0.23914	N	N	Metabolism	carbon metabolism	conserved protein of aldolase II superfamily likely involved in carbohydrate metabolism
KLLA0F03212g		YJR095W	SFC1	2.0722	1.08636	Y	2.69803	N	-0.913431	N	N	Metabolism	carbon metabolism - 2-carbon utilization	Mitochondrial succinate-fumarate transporter; required for ethanol and acetate utilization
KLLA0C06677g		YKL221W	MCH2	5.4034	3.67188	Y	5.10638	Y	3.86928	N	N	Metabolism	carbon metabolism - carboxylic acid transport	protein related to mammalian monocarboxylic acid permease; one of five highly similar K.lactis subtelomeric genes
KLLA0E09571g		YLR004C	THI73	2.6406	1.90679	Y	1.58615	Y	2.39781	N	N	Metabolism	carbon metabolism - carboxylic acid transport	plasma membrane permease, proposed to be involved in carboxylic acid uptake
KLLA0F11077g				0.9409	1.26863	Y	1.33208	Y	1.37228	N	N	Metabolism	carbon metabolism - carboxylic acid transport	Related to ESBP6 - Protein with similarity to monocarboxylate permeases
KLLA0B02563g		YKL188C	PXA2	4.3907	1.99763	Y	2.94802	Y	2.19121	N	N	Metabolism	carbon metabolism - fatty acid oxidation	Subunit of transport complex to import long-chain fatty acids into peroxisomes, complex with Pxa1
KLLA0E15181g				5.0945	3.18727	Y	4.72779	Y	3.42687	N	N	Metabolism	carbon metabolism - fatty acid oxidation	Acyl-CoA dehydrogenase
KLLA0F09933g		YGL205W	POX1	3.8384	2.29419	Y	4.00061	Y	2.50454	N	N	Metabolism	carbon metabolism - fatty acid oxidation	Fatty-acyl coenzyme A oxidase; fatty acid beta-oxidation pathway
KLLA0F09141g	GDP1	YJL052W	TDH1	1.7757	1.45499	N	0.515606	Y	1.14481	N	N	Metabolism	carbon metabolism - gluconeogenesis/glycolysis	Glyceraldehyde-3-phosphate dehydrogenase (GAPDH), isozyme 1; involved in glycolysis and gluconeogenesis
KLLA0C08107g		YER065C	ICL1	1.4614	1.81602	Y	1.19258	N	0.714002	N	N	Metabolism	carbon metabolism - glyoxylate cycle	Isocitrate lyase; catalyzes formation of succinate and glyoxylate from isocitrate, key reaction of glyoxylate cycle
KLLA0F00792g		YPL113C	YPL113C	0.91	1.17969	N	0.943782	N	0.585069	N	N	Metabolism	carbon metabolism - glyoxylate cycle	Glyoxylate reductase; acts on glyoxylate and hydroxypyruvate substrates
KLLA0E16259g	JEN1	YKL217W	JEN1	0.9284	1.04313	N	0.147849	N	-1.13567	N	N	Metabolism	carbon metabolism - lactate utilization	Monocarboxylate/proton symporter; transport dependent on pH gradient; involved in lactate uptake in K.lactis
KLLA0D08811g		YJL218W	YJL218W	1.0876	2.50588	Y	3.44707	N	0.0846187	N	N	Metabolism	carbon metabolism - maltose utilization	Putative maltose -O-acetyltransferase; outside of Kluyveromyces top hits all bacterial, sugar O-acetyltransferases
KLLA0E14213g		YPR002W	PDH1	4.6807	3.07541	Y	4.93803	Y	2.84895	N	N	Metabolism	carbon metabolism - propionate utilization	Putative 2-methylcitrate dehydratase; mitochondrial protein involved in respiration and propionate utilization
KLLA0D05379g		YFL040W	YFL040W	7.1618	3.52521	Y	3.80168	Y	3.78842	N	Y	Metabolism	carbon metabolism - sugar transport	Putative transporter; member of the sugar porter family; may have role in sterol transport
KLLA0D19953g		YGR289C/YBR298C	MAL11/MAL31	2.6289	1.34092	Y	1.36808	N	-0.632851	N	N	Metabolism	carbon metabolism - sugar transport	High-affinity maltose transporter (alpha-glucoside transporter); one of two K.lactis genes
KLLA0E14235g		YPR001W	CIT3	4.6807	4.92998	Y	5.08613	Y	4.3953	N	N	Metabolism	carbon metabolism - TCA cycle	Dual specificity mitochondrial citrate and methylcitrate synthase
KLLA0F14322g	SIP4	YJL089W	SIP4	1.5326	1.15831	N	0.742875	N	0.225803	N	N	Metabolism	carbon metabolism - txn regulation	C6 zinc cluster transcriptional activator; binds to the carbon source-responsive element (CSRE) of gluconeogenic genes
KLLA0F21824g				2.0037	3.4451	Y	3.48034	Y	4.24855	N	N	Metabolism	carbon metabolism - txn regulation	protein with GCR1_C domain found in transcriptional activators of glycolytic enzymes
KLLA0A09449g		YGR260W	TNA1	7.2408	2.08467	Y	2.19918	Y	2.27827	N	Y	Metabolism	cofactor - NAD homeostasis	High affinity nicotinic acid plasma membrane permease
KLLA0D06655g		YOR209C	NPT1	3.8801	2.99959	Y	3.12126	Y	2.90815	N	N	Metabolism	cofactor - NAD homeostasis	Nicotinate phosphoribosyltransferase; acts in salvage pathway of NAD+ biosynthesis
KLLA0B09658g		YPR127W	YPR127W	1.3912	2.104	Y	3.06392	Y	2.22717	N	N	Metabolism	cofactor - pyridoxine	Putative pyridoxine 4-dehydrogenase; PLP is required coenzyme for gylcogen phosphorylase; PLP is precursor for thiamin
KLLA0B13926g		YOL055C/YPL258C/YPR121W	THI20/21/22	5.6255	2.52983	Y	2.31944	Y	2.3856	N	N	Metabolism	cofactor - thiamine	Trifunctional enzyme of thiamine biosynthesis, thiamin required for sugar fermentation; single K.lactis gene is related to three similar S.cerevisiae genes
KLLA0E10935g				2.2475	1.32723	Y	2.21548	N	0.881831	N	N	Metabolism	nitrogen metabolism - allantoin	Uricase, first step of conversion of uric acid to allantoin
KLLA0F05335g				5.5062	1.36962	Y	2.29272	N	0.596017	N	N	Metabolism	nitrogen metabolism - allantoin	OHCU decarboxylase; third step of conversion of uric acid to allantoin
KLLA0E24993g		YDL210W	UGA4	2.076	1.83626	Y	3.4082	N	0.76869	N	N	Metabolism	nitrogen metabolism - GABA	GABA permease involved in utilization of GABA as nitrogen source; one of three highly similar K.lactis genes
KLLA0A00176g		YDL024C/YBR092C/YBR093C/YAR071W/YHR215W	DIA3, PHO3/5/11/12	5.1841	3.35046	Y	4.71526	Y	3.52582	N	Y	Metabolism	phosphate uptake	Putative acid phosphatase; one of five highly similar K.lactis subtelomeric genes related to five S.cerevisiae genes
KLLA0D11066g		YHR136C	SPL2	2.7072	2.0201	N	-0.121809	Y	1.72453	N	N	Metabolism	phosphate uptake	Protein with similarity to cyclin-dependent kinase inhibitors; downregulates low-affinity phosphate transport during phosphate limitation
KLLA0E02443g		YDR374C	PHO92	2.9959	4.777	Y	3.50103	Y	4.90774	N	N	Metabolism	phosphate uptake	RNA binding protein that destabilizes PHO4 mRNA
KLLA0D18964g				3.0447	4.60065	Y	5.11207	Y	5.33186	N	N	Metabolism	phospholipid homeostasis	Related to DPP1 - Diacylglycerol pyrophosphate phosphatase; putative lipid phosphate phosphatase
KLLA0F24509g		YOL108C	INO4	6.7283	1.87248	Y	2.74618	Y	1.15707	N	N	Metabolism	phospholipid homeostasis	Transcription factor; required for induction of inositol-choline-regulated genes involved in phospholipid synthesis
KLLA0C06699g				5.4034	2.54316	Y	4.27963	Y	2.5745	N	N	Metabolism	possible secondary metabolite	2-oxoglutarate/Fe(II)-dependent dioxygenase; belongs to PcbC superfamily; could be involved in secondary metabolite biosynthesis
KLLA0C19184g	PUL1			3.0234	3.1656	Y	3.88224	Y	3.54086	N	N	Metabolism	possible secondary metabolite	conserved protein involved in pulcherrimin biosynthesis
KLLA0C19206g	PUL2			3.0234	3.36784	Y	3.70251	Y	4.25485	N	N	Metabolism	possible secondary metabolite	p450 superfamily member involved in pulcherrimin biosynthesis
KLLA0D15400g				3.9001	2.50731	Y	2.34173	Y	4.30736	N	N	Metabolism	possible secondary metabolite	Ntn hydrolase superfamily, Acyl-coenzyme A:6-aminopenicillanic acid acyl-transferase domain; orthologs are involved in penicillin biosynthesis; found in fungi but not related yeast species
KLLA0B11880g		YIR017C	MET28	1.069	2.10672	Y	1.34687	Y	1.94066	Y	N	Metabolism	sulfate assimilation	bZIP transcriptional activator; participates in regulation of sulfur metabolism
KLLA0B13321g		YKL001C	MET14	1.1387	2.86905	Y	3.33535	Y	2.93826	N	N	Metabolism	sulfate assimilation	Adenylylsulfate kinase, required for sulfate assimilation and involved in methionine metabolism
KLLA0A00286g		YJL074C	SMC3	1.4198	1.06996	N	0.138209	N	0.399944	N	N	Other	chromosome organization	Subunit of cohesin complex; required for sister chromatid cohesion in mitotic cells; also required, with Rec8p, for cohesion and recombination during meiosis
KLLA0B08283g	MTF1	YMR228W	MTF1	1.5422	1.01117	N	-0.238935	Y	1.56517	N	N	Other	mitochondrial gene expression	Mitochondrial RNA polymerase specificity factor; facilitates open complex formation and generation of RNA primers during mitochondrial transcription
KLLA0E20659g		YBL080C	PET112	2.1828	1.03559	N	0.417221	Y	1.29529	N	N	Other	mitochondrial gene expression	Subunit of trimeric GatFAB AmidoTransferase(AdT) complex; involved in formation of Q-tRNAQ from E-tRNAQ
KLLA0B00517g				3.4988	2.58149	Y	3.29275	Y	2.90965	N	N	Other	RNA binding protein	Related to SRO9/SLF1 - RNA-binding protein; may be involved in translation control or nuclear export
KLLA0D05203g		YLR063W	BMT6	1.4402	1.13101	N	-0.480693	Y	1.30665	N	N	Other	rRNA modification	Methyltransferase required for m3U2843 methylation of the 25S rRNA
KLLA0F00946g		YOR201C	MRM1	3.918	1.06009	N	-1.10182	Y	1.76469	N	N	Other	rRNA modification	Ribose methyltransferase; modifies a functionally critical, conserved nucleotide in mitochondrial 21S rRNA
KLLA0A11792g				5.3535	1.52221	Y	2.1062	Y	1.53062	N	N	Other	signalling	Rap/Ran GAP domain
KLLA0B09878g		YPL054W	LEE1	5.1351	2.27639	Y	2.85926	Y	2.19368	N	N	Other	transcription factor	Zinc-finger protein of unknown function
KLLA0F08701g		YOR315W	SFG1	6.3074	1.41429	N	0.222421	Y	1.35956	N	N	Other	transcription factor	Putative transcription factor; required for growth of superficial pseudohyphae
KLLA0F22319g				3.5119	5.24739	Y	4.3146	Y	5.34068	N	N	Other	transcription factor	Related to CMR3/YPR015C - two tandem genes encoding zinc finger proteins
KLLA0F25190g				3.1222	1.58121	Y	1.5339	Y	2.14856	N	N	Other	transcription factor	Related to MSN1 - Transcriptional activator
KLLA0D12606g				6.229	1.13701	Y	1.14788	N	0.662326	N	N	Other	transporter	Related to HOL1 - Putative transporter in major facilitator superfamily, 12-spanner drug:H(+) antiporter DHA1 family
KLLA0C01936g		YNL279W	PRM1	3.0646	2.96487	Y	2.67867	Y	3.94808	N	Y	Sexual Cycle	mating - cell fusion	Pheromone-regulated multispanning membrane protein; involved in membrane fusion during mating; localizes to shmoo tip
KLLA0E10891g		YGL032C	AGA2	2.2475	5.52294	Y	5.8119	Y	5.76841	N	N	Sexual Cycle	mating - cell fusion	Adhesion subunit of a-agglutinin, serves as ligand for α-agglutinin
KLLA0F20878g		YDL223C/YNL195C	HBT1/YNL195C	1.8714	1.06372	Y	1.51762	N	0.503936	Y	N	Sexual Cycle	mating - cell fusion	Shmoo tip protein; involved in polarized growth
KLLA0D15631g		YPR122W	AXL1	1.7987	1.11509	Y	1.46508	Y	1.10657	N	N	Sexual Cycle	mating - signaling	Endoprotease of a-factor, inolved in pheromone maturation and required for axial budding
KLLA0D15917g	BAR1	YIL015W	BAR1	2.3211	5.53037	Y	5.17698	Y	5.89485	N	N	Sexual Cycle	mating - signaling	Secreted aspartyl protease, cleaves α-factor to help cell find mating partner
KLLA0E06183g		YJR086W	STE18	5.5529	4.58534	Y	4.12063	Y	4.32668	N	N	Sexual Cycle	mating - signaling	Gamma subunit of G protein involved in pheromone response
KLLA0E19075g	MFalpha1	YPL187W/YGL089C	MFα1/MFα2	2.2706	4.25753	Y	5.33951	Y	4.29199	N	N	Sexual Cycle	mating - signaling	Mating pheromone alpha-factor
KLLA0F25916g	GPA1	YHR005C	GPA1	1.7313	2.20823	Y	1.79562	Y	2.50168	N	N	Sexual Cycle	mating - signaling	Alpha subunit of G protein involved in pheromone response; negatively regulates mating pathway by sequestering G(beta)gamma
KLLA0C00693g		YCL055W	KAR4	3.5999	1.64452	Y	1.72276	Y	2.95298	N	N	Sexual Cycle	mating - txn regulation	Transcription factor required for response to pheromones; expression of target genes delayed compared to those induced by Ste12p alone
KLLA0B10010g		YPR192W	AQY1	0.9142	1.26838	N	0.91966	Y	1.7311	N	N	Sexual Cycle	sporulation	Spore-specific water channel; mediates transport of water across cell membranes; may play role in spore maturation and freeze tolerance
KLLA0B10373g		YBR250W	SPO23	3.0356	2.37762	Y	3.01528	Y	2.04797	N	Y	Sexual Cycle	sporulation	Protein of unknown function; associates with meiosis-specific protein Spo1p; tandem duplicate of B10395
KLLA0B10395g		YBR250W	SPO23	3.0356	2.59587	Y	1.95676	Y	2.431	N	Y	Sexual Cycle	sporulation	Protein of unknown function; associates with meiosis-specific protein Spo1p; tandem duplicate of B10373
KLLA0D18909g		YNL202W	SPS19	3.0447	1.08573	Y	2.50267	N	0.58628	N	Y	Sexual Cycle	sporulation	Peroxisomal 2,4-dienoyl-CoA reductase; auxiliary enzyme of fatty acid beta-oxidation; induced during sporulation and in presence of oleate
KLLA0E07041g		YER115C	SPR6	0.886	2.1372	Y	2.71823	Y	1.9058	N	N	Sexual Cycle	sporulation	Protein of unknown function; expressed during sporulation
KLLA0F08679g		YOR313C	SPS4	6.3074	2.16514	Y	2.31041	Y	2.9998	N	Y	Sexual Cycle	sporulation	Protein whose expression is induced during sporulation
KLLA0C09328g		YIL073C	SPO22	0.896	2.1322	Y	2.69882	Y	1.95955	N	N	Sexual Cycle	sporulation - meiosis	Meiosis-specific protein essential for chromosome synapsis
KLLA0C12287g		YOL104C	NDJ1	1.1068	3.14113	Y	3.35449	Y	3.69291	N	N	Sexual Cycle	sporulation - meiosis	Protein that regulates meiotic SPB cohesion and telomere clustering
KLLA0E20637g		YER106W	MAM1	2.1828	5.31582	Y	6.38862	Y	5.98676	N	Y	Sexual Cycle	sporulation - meiosis	Monopolin; kinetochore associated protein involved in chromosome attachment to meiotic spindle; expressed during meiosis I
KLLA0F20405g	RED1	YLR263W	RED1	1.0479	1.48416	Y	1.76855	Y	1.5428	N	N	Sexual Cycle	sporulation - meiosis	Component of synaptonemal complex; involved in chromosome segregation during first meiotic division; critical for coupling checkpoint signaling to SC formation
KLLA0A09361g		YHR184W	SSP1	7.2408	2.55805	Y	2.39975	Y	3.49193	N	Y	Sexual Cycle	sporulation - spore membrane	subunit of leading edge protein complex that forms ring-like structure at leading edge of the prospore membrane
KLLA0A09405g		YHR185C	PFS1	7.2408	4.86068	Y	6.57987	Y	4.72726	N	Y	Sexual Cycle	sporulation - spore membrane	Sporulation protein required for prospore membrane formation at spindle poles
KLLA0B01936g		YGL138C	YGL138C	3.5396	4.59184	Y	4.99925	Y	5.24352	N	Y	Sexual Cycle	sporulation - spore membrane	Putative protein of unknown function; associated with prospore membrane
KLLA0E22551g		YJR036C	HUL4	5.1006	1.33339	Y	1.87313	Y	1.40327	N	N	Sexual Cycle	sporulation - spore membrane	Putative hect domain E3 ubiquitin ligase, induced during sporulation and associated with prospore membrane
KLLA0F20900g		YDL222C/YNL194C	FMP45/YNL194C	1.8714	1.0608	Y	3.02794	N	-0.196489	Y	N	Sexual Cycle	sporulation - spore membrane	Membrane protein required for sporulation and maintaining sphingolipid content
KLLA0B08129g		YGR059W	SPR3	3.4995	2.8814	Y	2.0218	Y	4.968	N	Y	Sexual Cycle	sporulation - spore membrane septin complex	Septin protein involved in sporulation, localizes to prospore wall
KLLA0D02068g		YGL170C	SPO74	2.4618	5.491	Y	4.63865	Y	6.28302	N	Y	Sexual Cycle	sporulation - spore membrane spindle-pole body	Component of the meiotic outer plaque of spindle pole body; involved in prospore membrane formation
KLLA0A10571g		YBR045C	GIP1	2.2916	4.21813	Y	4.76501	Y	5.6211	N	Y	Sexual Cycle	sporulation - spore wall	Meiosis-specific regulatory subunit of Glc7 protein phosphatase; regulates spore wall formation, septin organization, and late meiotic gene expression
KLLA0B05885g		YLR341W	SPO77	2.5188	5.75726	Y	4.2182	Y	6.72898	N	Y	Sexual Cycle	sporulation - spore wall	Meiosis-specific protein required for spore wall formation and prospore membrane closure
KLLA0C00979g		YDR523C	SPS1	1.3407	1.86855	Y	2.21851	Y	2.48347	N	Y	Sexual Cycle	sporulation - spore wall	Putative serine/threonine kinase required for efficient spore packaging, prospore membrane closure, and localization of spore wall synthesis enzymes
KLLA0C05324g		YOR190W/YLR300W	SPR1/EXG1	1.153	1.28808	Y	1.22274	Y	1.4548	N	N	Sexual Cycle	sporulation - spore wall	Exo-1,3-beta-glucanase involved in cell wall beta-glucan assembly; Spr1 is sporulation-specific paralog
KLLA0C06743g		YDR402C	DIT2	5.4034	2.72804	Y	2.26568	Y	3.14081	N	N	Sexual Cycle	sporulation - spore wall	Enzyme required for production of N,N-bisformyl dityrosine required for spore wall maturation
KLLA0C06765g		YDR403W	DIT1	5.4034	1.89455	Y	2.09392	Y	2.25292	N	Y	Sexual Cycle	sporulation - spore wall	Enzyme that produces soluble LL-dityrosine-containing precursor of spore wall
KLLA0C17226g		YLR308W	CDA2	6.4754	8.51475	Y	8.17394	Y	9.44896	N	Y	Sexual Cycle	sporulation - spore wall	Chitin deacetylase; involved in biosynthesis of ascospore wall component chitosan
KLLA0E02333g		YDR371W	CTS2	3.3892	3.82583	Y	3.85869	Y	4.47628	N	N	Sexual Cycle	sporulation - spore wall	Putative chitinase
KLLA0E19295g		YGL081W	YGL081W	1.5427	4.02865	Y	6.55749	Y	4.00348	N	N	Sexual Cycle	sporulation - spore wall	Putative protein of unknown function; interacts genetically with CHS5 involved in chitin biosynthesis
KLLA0F04906g		YLR213C	CRR1	1.5967	4.5966	Y	4.70832	Y	5.51815	N	Y	Sexual Cycle	sporulation - spore wall	Putative glycoside hydrolase required for spore wall assembly, possibly for cross-linking glucan and chitosan layers
KLLA0F06028g		YCR045C	RRT12	5.0195	3.16812	Y	1.67035	Y	3.80209	N	N	Sexual Cycle	sporulation - spore wall	Probable subtilisin-family protease; role in forming dityrosine layer of spore walls
KLLA0F07337g		YMR148W	LDO16	1.1121	1.20286	N	0.97926	N	0.977286	N	N	Sexual Cycle	sporulation - spore wall	Protein of unknown function with possible role in spore wall assembly
KLLA0F07601g		YAL018C/YOLO48C	LDS1/RRT8	4.8072	3.12431	Y	3.849	Y	3.28	N	Y	Sexual Cycle	sporulation - spore wall	Involved in spore wall assembly; localizes to lipid droplets near prospore membrane
KLLA0F11275g		YOR242C	SSP2	6.0279	5.35034	Y	6.30973	Y	5.4686	N	N	Sexual Cycle	sporulation - spore wall	Sporulation specific protein that localizes to the spore wall
KLLA0F25058g		YOR298W	MUM3	3.5486	4.92545	Y	3.81436	Y	5.92263	N	Y	Sexual Cycle	sporulation - spore wall	Protein involved in outer spore wall organization; similarity to tafazzin superfamily of acyltransferases
KLLA0F25212g		YLR054C	OSW2	3.1222	3.09586	Y	3.38653	Y	3.98633	N	N	Sexual Cycle	sporulation - spore wall	Protein of unknown function reputedly involved in spore wall assembly
KLLA0D03014g				1.5279	3.69803	Y	3.56926	Y	4.24316	N	N	Sexual Cycle	sporulation - txn regulation	Related to RME1 - Transcription factor, blocks meiosis by repressing IME1 and promotes mitosis by activating CLN2
KLLA0E05963g		YJR094C	IME1	6.1006	3.15307	Y	4.15205	Y	3.97905	N	N	Sexual Cycle	sporulation - txn regulation	Transcription factor, master regulator of meiosis
KLLA0F24420g		YHR124W	NDT80	6.7283	1.58327	Y	1.91163	Y	1.60928	N	N	Sexual Cycle	sporulation - txn regulation	Transcription factor; activates middle sporulation genes
KLLA0A02387g		YOR152C	ATG40	1.5038	2.56933	Y	3.94573	Y	2.61356	N	N	Starvation Response	autophagy	Autophagy receptor; involved specifically in autophagy of cortical and cytoplasmic ER in response to nitrogen starvation or rapamycin
KLLA0E00661g		YLL042C	ATG10	1.7234	1.17314	Y	2.21379	N	0.832602	N	N	Starvation Response	autophagy	Conserved E2-like conjugating enzyme, forms Atg12p-Atg5p conjugate which is critcal step in autophagy
KLLA0F09427g				3.8259	2.4668	Y	2.59046	Y	2.49266	N	N	Starvation Response	autophagy	Related to ATG22 - Vacuolar integral membrane protein required for efflux of amino acids during autophagic body breakdown
KLLA0B00308g		YAR050W/YHR211W/YAL063C/YKR102W	FLO1/5/9/10	6.0089	3.34802	Y	2.60603	Y	5.04448	Y	N	Starvation Response	cell adhesion	Lectin-like protein involved in flocculation; one of six similar K.lactis genes related to four similar S.cerevisiae genes
KLLA0B14916g		YAR050W/YHR211W/YAL063C/YKR102W	FLO1/5/9/10	10.2668	3.90786	Y	4.80498	N	NA	N	N	Starvation Response	cell adhesion	Lectin-like protein involved in flocculation; one of six similar K.lactis genes related to four similar S.cerevisiae genes
KLLA0E15005g				0.9526	1.54213	Y	2.66129	Y	1.40779	N	N	Starvation Response	protein turnover	Related to CPS1 - Vacuolar carboxypeptidase S induced in low-nitrogen
KLLA0B10120g		YDR317W	HIM1	3.7426	1.93077	Y	1.46401	Y	1.87023	N	N	Stress Response	DNA damage	Protein of unknown function involved in DNA repair
KLLA0E05259g		YDL059C	RAD59	1.0975	1.26905	Y	1.87618	Y	1.57539	N	N	Stress Response	DNA damage	Protein involved DNA double-strand break repair; anneals complementary single-stranded DNA
KLLA0E00221g		YPR201W	ARR3	3.1054	2.15051	Y	3.19461	Y	2.40198	N	N	Stress Response	heavy metal	Plasma membrane metalloid/H+ antiporter; transports arsenite and antimonite; required for resistance to arsenic compounds; one of two highly similar K.lactis subtelomeric genes
KLLA0E00243g		YPR200C	ARR2	3.1054	3.21766	Y	3.51235	Y	3.21884	N	N	Stress Response	heavy metal	Arsenate reductase required for arsenate resistance
KLLA0F00242g		YPR201W	ARR3	3.4856	1.08753	Y	1.6762	Y	1.40912	N	N	Stress Response	heavy metal	Plasma membrane metalloid/H+ antiporter; transports arsenite and antimonite; required for resistance to arsenic compounds; one of two highly similar K.lactis subtelomeric genes
KLLA0C01562g		YCL026C-A/YCL026C-B	FRM2/HBN1	0.9658	1.17129	Y	2.64087	Y	1.5342	N	Y	Stress Response	oxidative stress	Type II nitroreductase, uses NADH as reductant; involved in the oxidative stress response and lipid signaling; FRM2 and HBN1 are S.cerevisiae tandem duplicates
KLLA0C14212g		YCR106W	RDS1	1.6443	1.70562	Y	1.77337	Y	1.83167	N	N	Stress Response	toxin	Putative zinc cluster transcription factor, confers resistance to cyclohexamide
KLLA0A07645g				1.8466	6.27343	Y	5.29352	Y	7.23859	N	N	Unknown	conserved protein	conserved protein of unknown function
KLLA0A09779g				1.6709	2.19964	Y	2.32509	Y	2.29524	N	N	Unknown	conserved protein	Related to HUA1 - conserved protein with possible role in actin patch assembly
KLLA0A11748g		YHR126C	ANS1	5.3535	1.22264	Y	1.5001	Y	2.29437	N	Y	Unknown	conserved protein	Putative GPI protein; localized to vacuole
KLLA0B07711g				3.6443	4.3641	Y	3.77759	Y	5.35692	N	N	Unknown	conserved protein	conserved protein of unknown function
KLLA0B08261g				1.5422	6.00176	Y	5.62064	Y	6.2577	N	N	Unknown	conserved protein	conserved protein of unknown function
KLLA0B09900g		YBR157C	ICS2	5.1351	1.3673	N	0.933021	Y	1.00663	N	N	Unknown	conserved protein	conserved protein of unknown function
KLLA0B10219g				6.5815	4.64995	Y	5.06191	Y	5.68139	N	N	Unknown	conserved protein	conserved protein of unknown function
KLLA0B10406g				3.0356	2.64625	Y	1.84942	Y	2.43777	N	N	Unknown	conserved protein	conserved protein of unknown function
KLLA0C05456g				2.3967	4.7428	Y	6.41112	Y	5.01178	N	N	Unknown	conserved protein	conserved protein of unknown function
KLLA0C11517g				5.1078	4.61692	Y	4.48119	Y	5.21773	N	N	Unknown	conserved protein	conserved protein of unknown function; serine-rich; likely cell-surface protein
KLLA0C14190g				2.3656	2.96992	Y	4.39818	Y	3.23339	N	N	Unknown	conserved protein	conserved protein of unknown function; has CBS pair domains, which regulate activity in response to ligand binding
KLLA0C14850g				1.056	1.93559	Y	1.40574	Y	2.37542	N	N	Unknown	conserved protein	conserved protein of unknown function
KLLA0C17864g		YER175C	TMT1	1.114	1.25304	Y	2.2324	N	0.843604	N	N	Unknown	conserved protein	Trans-aconitate methyltransferase; catalyzes methyl esterification of 3-isopropylmalate, an intermediate of leucine biosynthesis and trans-aconitate, which inhibits TCA cycle
KLLA0D04774g				0.8994	1.28904	Y	1.2604	Y	2.50728	N	N	Unknown	conserved protein	conserved protein of unknown function; possible coiled-coil
KLLA0D06479g		YBR285W	YBR285W	1.3036	1.51583	Y	1.9383	Y	1.05402	N	N	Unknown	conserved protein	conserved protein of unknown function
KLLA0E05677g		YBL043W/YJR115W	ECM13/YJR115W	0.9042	1.95363	N	0.697019	Y	2.56407	N	N	Unknown	conserved protein	conserved protein of unknown function
KLLA0E05875g		YBL049W	MOH1	1.8376	4.26194	Y	5.67259	Y	4.51186	N	N	Unknown	conserved protein	conseved protein of unknown function, essential for stationary phase survival
KLLA0E09153g				1.2109	5.233	Y	5.33911	Y	5.39253	N	N	Unknown	conserved protein	Related to YDL114W - Putative short-chain dehydrogenase/reductase
KLLA0E09901g				2.1335	1.8425	Y	2.15922	Y	2.78393	N	N	Unknown	conserved protein	Related to YNR029C - P-loop NTPase protein of unknown function with CobW metal chaperone domain; likely GTPase
KLLA0E12387g		YBL029C-A	YBL029C-A	1.5323	1.09185	N	0.600697	N	0.660493	N	N	Unknown	conserved protein	conserved protein of unknown function
KLLA0E13883g				6.963	1.91199	Y	2.03897	Y	3.3196	N	N	Unknown	conserved protein	conserved protein of unknown function; coiled-coil domain
KLLA0E19251g		YOR389W	YOR389W	1.2816	1.49697	Y	1.89877	Y	1.61404	N	N	Unknown	conserved protein	Putative membrane protein of unknown function; also related to YPL277C
KLLA0E22595g		YEL023C	YEL023C	5.1006	1.87543	Y	1.75217	Y	3.15103	N	Y	Unknown	conserved protein	conserved protein of unknown function; expression is increased greatly during sporulation
KLLA0E24421g				4.1358	1.03776	Y	2.21031	Y	1.70913	N	N	Unknown	conserved protein	Related to IMO32 - Conserved mitochondrial protein of unknown function, alpha beta hydrolase
KLLA0F05379g		YDL186W	YDL186W	5.5062	6.74149	Y	7.63195	Y	7.01916	N	N	Unknown	conserved protein	Putative protein of unknown function
KLLA0F07271g		YPL033C	SRL4	1.0018	6.04157	Y	6.08086	Y	6.53589	N	Y	Unknown	conserved protein	Putative short chain dehydrogenase; may be involved in regulation of dNTP production
KLLA0F08745g		YMR244W	YMR244W	4.1826	3.45357	Y	4.31211	Y	3.92348	N	Y	Unknown	conserved protein	SUN family protein of unknown function; localized to vacuole
KLLA0F22902g				5.1304	1.76559	Y	2.58745	Y	3.31073	N	N	Unknown	conserved protein	conserved protein of unknown function
KLLA0F24464g		YNL134C/YCR102C/YLR460C	YNL134C/YCR102C/YLR460C	6.7283	2.2839	Y	2.84837	Y	2.48322	N	Y	Unknown	conserved protein	Quinone oxidoreductase of medium-chain dehydrogenase/reducatse (MDR) family; syntenic ortholog of YNL134C, which is similar to two S.cerevisiae subtelomeric genes
KLLA0F24596g				2.8123	7.90488	Y	6.26719	Y	7.72516	N	N	Unknown	conserved protein	conserved protein of unknown function
KLLA0F25520g				0.9162	3.55683	Y	4.27825	Y	3.68935	N	N	Unknown	conserved protein	conserved protein of unknown function; DUF1688
KLLA0A05687g				3.8419	7.40022	Y	7.02233	Y	8.48873	N	N	Unknown	limited homology	BLAST hits in Kluyveromyces species only
KLLA0A08690g				0.9214	2.51474	Y	2.27906	Y	1.86572	N	N	Unknown	limited homology	BLAST hit in K. lactis only
KLLA0B01870g				1.1439	5.20487	Y	5.26538	Y	5.525	N	N	Unknown	limited homology	BLAST hits in Kluyveromyces species only
KLLA0B09042g				3.0708	5.52975	Y	6.29128	Y	5.54618	N	N	Unknown	limited homology	BLAST hits in Kluyveromyces species only
KLLA0B10098g				3.7426	1.22891	N	0.395367	Y	1.49893	N	N	Unknown	limited homology	BLAST hit in K. lactis only
KLLA0C00176g				3.5009	2.01133	Y	4.57854	N	NA	N	N	Unknown	limited homology	BLAST hits in Kluyveromyces species only
KLLA0C00671g				3.5999	3.57685	Y	3.77231	Y	4.48549	N	N	Unknown	limited homology	BLAST hits in Kluyveromyces species only
KLLA0C11121g				3.4511	3.40183	Y	4.01858	Y	4.50584	N	N	Unknown	limited homology	BLAST hits in Kluyveromyces species only
KLLA0D00187g				3.2681	3.49629	Y	4.57012	Y	1.55499	N	N	Unknown	limited homology	BLAST hits in Kluyveromyces species only
KLLA0D08789g				1.0876	2.45721	Y	3.34998	Y	1.17708	N	N	Unknown	limited homology	BLAST hit in K. lactis only
KLLA0D09218g				1.3084	6.2265	Y	10.6642	Y	6.75394	N	N	Unknown	limited homology	BLAST hits in Kluyveromyces species only
KLLA0D13288g				1.9926	7.6312	Y	6.85072	Y	8.20441	N	N	Unknown	limited homology	BLAST hits in Kluyveromyces species only
KLLA0D19949g				2.6289	1.37828	Y	1.29163	N	-0.48974	N	N	Unknown	limited homology	BLAST hit in K. lactis only
KLLA0E15203g				5.0945	2.71988	Y	4.11109	Y	3.38439	N	N	Unknown	limited homology	BLAST hits in Kluyveromyces species only
KLLA0E17293g				1.9964	6.91092	Y	6.13058	Y	7.51797	N	N	Unknown	limited homology	BLAST hits in Kluyveromyces species only
KLLA0E23805g				1.1923	2.02204	Y	2.50593	Y	1.82739	N	N	Unknown	limited homology	BLAST hit in K. lactis only
KLLA0E24443g				4.1358	6.55446	Y	6.25506	Y	7.64106	N	N	Unknown	limited homology	BLAST hits in Kluyveromyces species only
KLLA0F03234g				2.0722	1.23471	Y	2.43015	Y	1.37239	N	N	Unknown	limited homology	BLAST hits in Kluyveromyces species only
KLLA0F06061g				5.0195	3.31243	Y	1.71487	Y	3.8166	N	N	Unknown	limited homology	BLAST hits in Kluyveromyces species only
KLLA0F07348g				1.1121	1.02215	Y	3.14671	N	-0.911429	N	N	Unknown	limited homology	BLAST hits in Kluyveromyces species only
KLLA0F09977g				3.8384	2.29613	Y	2.70056	Y	2.62103	N	N	Unknown	limited homology	BLAST hits in Kluyveromyces species only
KLLA0F22341g				3.5119	3.35423	Y	4.53468	Y	3.43589	N	N	Unknown	limited homology	BLAST hits in Kluyveromyces species only
